# Supplementary material
Source: publisher figshare collection journal article supplement (https://acs.figshare.com/ndownloader/files/25109619)
Supplement: Supplementary file 1 [file 25109619]

## Supporting Information

**Title:** The NBDY microprotein regulates cellular RNA decapping

**Authors:** Zhenkun Na<sup>1,2,5</sup>, Yang Luo<sup>1,2,5</sup>, Jeremy A. Schofield<sup>2,3</sup>, Stephanie Smelyansky<sup>1,2,3</sup>, Alexandra Khitun<sup>1,2</sup>, Sowndarya Muthukumar<sup>4</sup>, Eugene Valkov<sup>4</sup>, Matthew D. Simon<sup>2,3</sup>, Sarah A. Slavoff<sup>1,2,3\*</sup>

**Affiliations:** <sup>1</sup>Department of Chemistry, Yale University, New Haven, Connecticut 06520, United States

<sup>2</sup>Chemical Biology Institute, Yale University, West Haven, Connecticut 06516, United States

<sup>3</sup>Department of Molecular Biophysics and Biochemistry, Yale University, New Haven, Connecticut 06529, United States

<sup>4</sup>Center for Cancer Research, National Cancer Institute, Frederick, Maryland 21702, United States

<sup>5</sup>These authors contributed equally

\*Correspondence to: [sarah.slavoff@yale.edu](mailto:sarah.slavoff@yale.edu)

**Figure S1| An anti-NBDY antibody is specific and reveals co-localization of endogenous NBDY with a decapping protein in P-bodies.** (a) Detection of endogenous NBDY by immunofluorescence (additional field of view). Fixed HEK 293T cells were stained with antibodies detecting NBDY or DCP1A. Scale bars, 10  $\mu$ m. (b) Analysis of *NBDY* knockout (KO) HEK 293T cell lines by Western blot using an anti-NBDY antibody, with comparison to wild type HEK 293T cells.

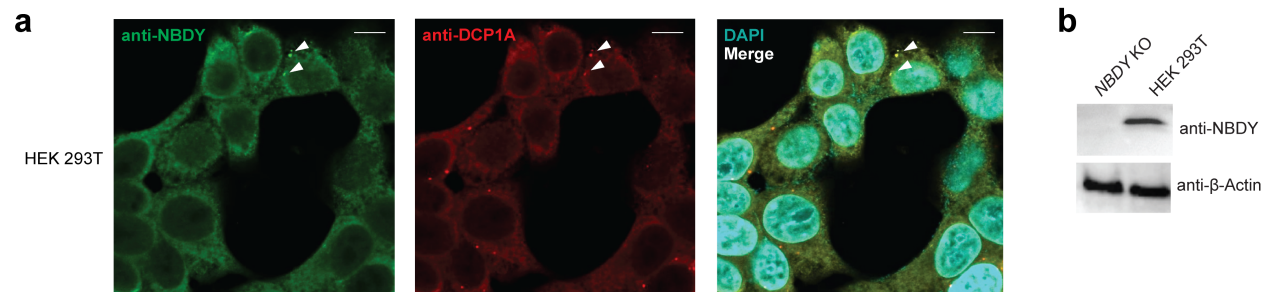

**Figure S2| NBDY interacts with DCP1A via a C-terminal polyproline motif.** A pulldown assay showing the direct interaction of GST-DCP1A-EVH1 with recombinant His<sub>6</sub>-tagged NBDY constructs.

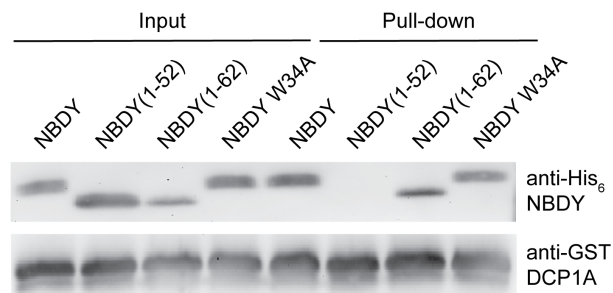

**Figure S3| NBDY knockout causes secondary changes in RNA synthesis.** (a,b) Top significant biological process GO terms of genes downregulated (a) or upregulated (b) by RNA synthesis in *NBDY* KO versus WT HEK 293T cells. Fisher's exact test was performed using PANTHER overrepresentation test with FDR<0.05. (c) The mean fold changes in RNA decay rate (red) vs synthesis rate (blue) for genes encoding RNA decay machineries that are exclusively downregulated in *NBDY* KO vs WT HEK 293T cells but not in *DCP2* KO.

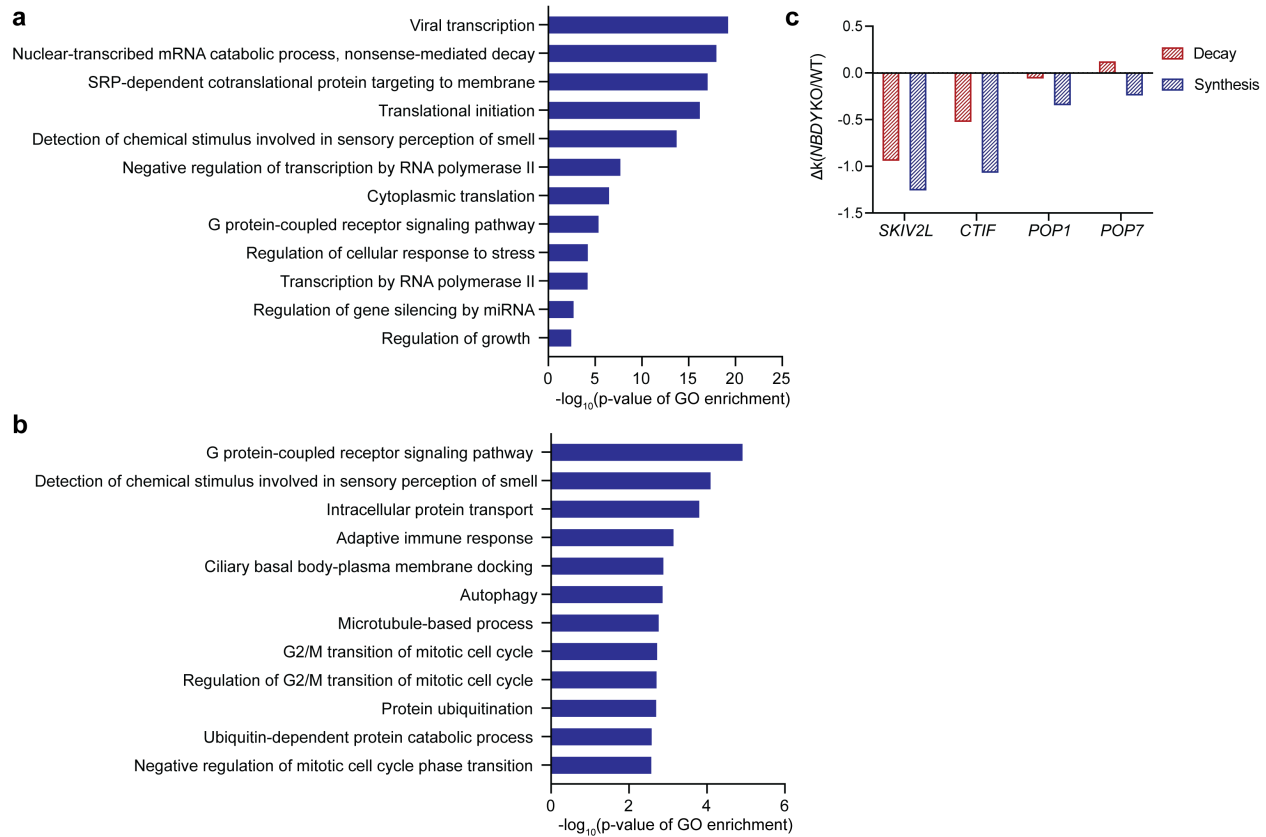



**Figure S4| NBDY regulates RNA decay.** (a) RNA stability measurement of selected genes belonging to the following classes: stabilized in both *DCP2* KO and *NBDY* KO (*LSM12*) and destabilized in both *DCP2* KO and *NBDY* KO (*MRE11*). Number of biological replicates:  $n=3$ . Error bars represent mean  $\pm$  s.d. Significance was analyzed by ANOVA linear regression. \*\* $P < 0.01$ ; \*\*\* $P < 0.001$ , Dunnett's test. (b) Western blot confirmation of *NBDY/XRN1* double knockout (DKO) cells.

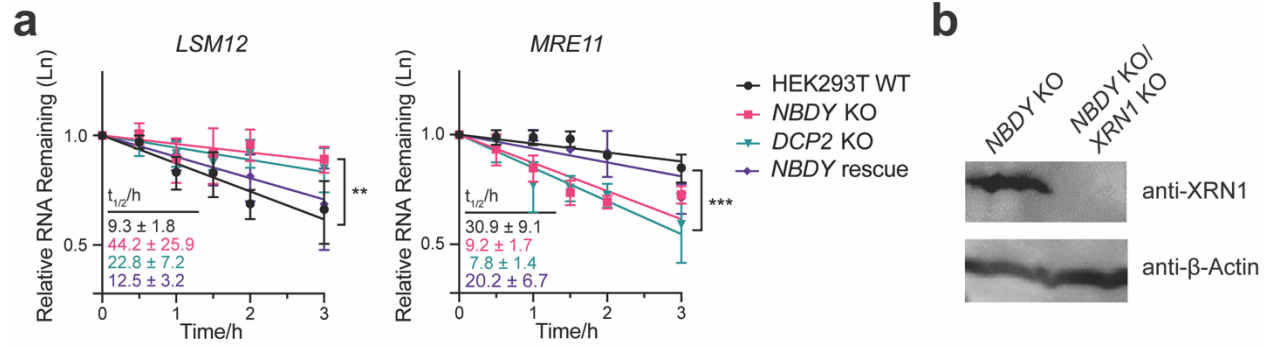

**Figure S5| NBDY status does not affect the activity of the RNA decapping complex *in vitro*.** (a) Silver stain of the decapping complex immunopurified from WT HEK 293T and *NBDY* KO cells. (b) Analysis of immunopurified decapping complex components by Western blot. (c) *In vitro* decapping assay with decapping complex immunopurified from *NBDY* KO or WT HEK 293T cells. EDTA inhibition served as a negative control.

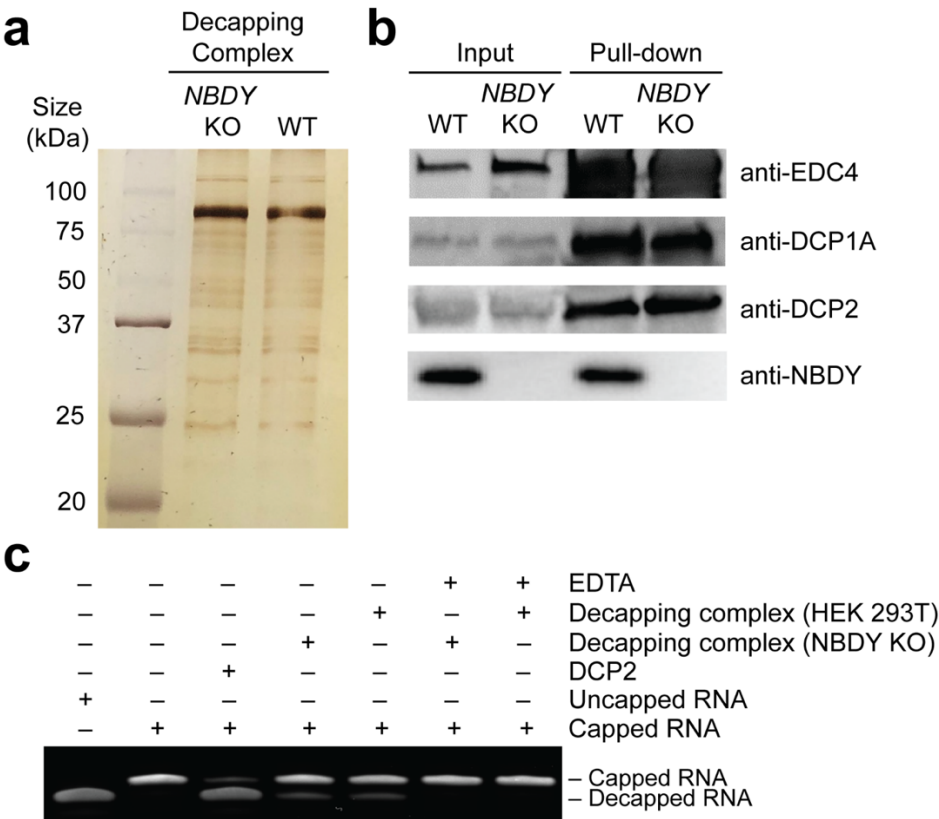

**Figure S6l NBDY interaction with DCP1A does not affect stability of a specific endogenous reporter transcript.** RNA life time of a DCP2 substrate, *RRP41*, was measured in NBDY rescue and NBDY (1-52) truncated construct (non-DCP1A-interacting) complementation cell line. Number of biological replicates:  $n=3$ . Error bars represent mean  $\pm$  s.d. Significance was evaluated by linear regression  $t$ -test; ns, not significant.

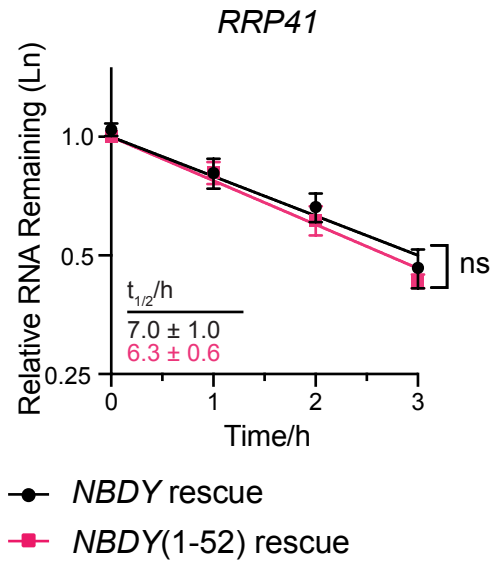

**Figure S7I Physical basis of differential regulation of DCP2 substrates by NBDY.** (a) P-body enrichment based on data from Hubstenberger *et al.* for each of the described classes of RNA stability changes in *DCP2* KO or *NBDY* KO vs WT HEK 293T cells. (b) Box plot depicting sum of p-values of NMD targeting based on data from Colombo *et al.* for indicated classes of RNA stability changes in *DCP2* KO or *NBDY* KO vs WT HEK 293T cells. Significance was evaluated by Mann Whitney *U* test; ns, not significant; \*\**P*<0.01; \*\*\*\**P*<0.0001. (c-f) Box plots representing 5' UTR length (c), coding sequence length (d), 3' UTR length (e) and GC content (f) for RNAs stabilized in both *DCP2* KO or *NBDY* KO vs WT HEK 293T cells or that exclusively in *DCP2* KO vs WT HEK 293T cells. Data were obtained from ENSEMBL (version 101). Significance was evaluated by Mann Whitney *U* test; ns, not significant; \*\*\**P*<0.001.

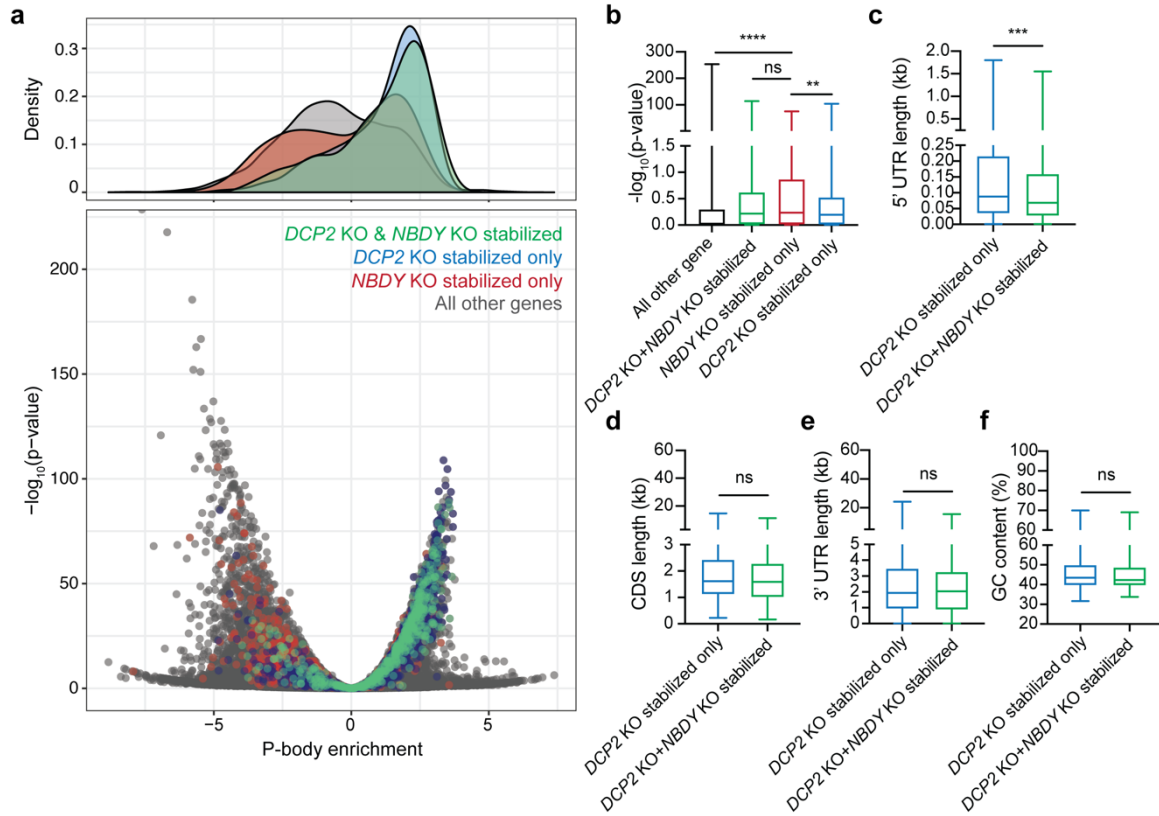

| Gene/Primer Name | Primer Sequences                                                    |
|------------------|---------------------------------------------------------------------|
| NBDY<br>Fwd/Rev  | 5' GGAGAAACTGACGACCCGTTTCTGT 3'<br>5' TCTCTACTTCTCCGGAGGAGGAGGG 3'  |
| DCP2<br>Fwd/Rev  | 5' GCATGAGTCAGTTCCACATCATTGA 3'<br>5' CAGACAGAAGATGACTATCCCAATCA 3' |
| XRN1<br>Fwd/Rev  | 5' CACTTTTCCCTGCTGCTTAAGAT 3'<br>5' ATTTCTGGGGGAGTTTACGC 3'         |

**Table S1.**

Gene specific PCR primers used in this study.

| Gene/Primer Name    | Primer Sequences                                                 |
|---------------------|------------------------------------------------------------------|
| MRE11<br>Fwd/Rev    | 5' ATGCAGTCAGAGGAAATGATACG 3'<br>5' CAGGCCGATCACCCATACAAT 3'     |
| ATM<br>Fwd/Rev      | 5' ATCTGCTGCCGTCAACTAGAA 3'<br>5' GATCTCGAATCAGGCGCTTAAA 3'      |
| ZNF84<br>Fwd/Rev    | 5' AGCAGCCTAGTGTCCTGG 3'<br>5' TGCCACATCATGTTACCATCTAC 3'        |
| GJC1<br>Fwd/Rev     | 5' AGCTGTAGGAGGAGAATCCATC 3'<br>5' TGCAAACGCATCATAACAGACA 3'     |
| EPC2<br>Fwd-2/Rev-2 | 5' GGGAGACAATGAGTAAACTCTCC 3'<br>5' GACGCAGTCGTTGAGATCAG 3'      |
| EPC2 Splint         | 5'<br>CCAACATGGCGGACATTACCCATCAAAGCCAGCAAACGCAGTGTTTCAT<br>TC 3' |
| Anchor Fwd          | 5' GCTGATGGCGATGAATGAACACTGC 3'                                  |

**Table S2.**

qRT-PCR and qSL-RT-PCR primers used in this study.
